# Supplementary material for: A systematic review of biologically-informed deep learning models for cancer: fundamental trends for encoding and interpreting oncology data
Source: BMC Bioinformatics. 2023 May 15;24:198. doi: 10.1186/s12859-023-05262-8 (PMC10186658; doi:10.1186/s12859-023-05262-8)
Supplement: Supplementary file 1 — Additional file 1: Strategies of domain knowledge integration and explainability methodsLegends: Types of omic data: G - genomics, P - proteomics, T - transcriptomics, E - epigenomics; GO - GeneOntology; PPI - protein-protein interaction; WGCNA - Weighted Correlation Network Analysis; Deep Learningarchitecture: AE - autoencoder, ANN - Artificial Neural Networks, CNN - Convolutional Neural Network, DAE -Denoising Autoencoder, DBN - Deep Belief Network, DNN - Deep Neural Network, GCNN - graph convolutionalneural network, GCNN-MLP - GCNN multilayer perceptron, MMD-VAE - Maximum Mean Discrepancy VariationalAutoencoder, VAE - Variational Autoencoder, VCDN - View Correlation Discovery Network; Interpretability method:LRP - layer-wise relevance propagation; Interpretability group: II - intrinsically interpretable, PH - post-hoc; Interpretability group: PROC - Processing; REPR - Representation; CREATE -Explanation producing; NA - not applicable. [file 12859_2023_5262_MOESM1_ESM.xlsx]

## Sheet: Sheet1
Additional file 1 --- Strategies of domain knowledge integration and explainability methods
Reference	Year	Type of omic data	Model's output	Prior knowledge	Prior knowledge database	DK integration (PRE - input data preprocessing, ARCH - model's architecture, POSTHOC)	DL model type / DL architecture	Interpretability method used
[78]	2018	single omic: T	survival prediction	pathways	KEGG	POSTHOC	DNN	partial derivatives
[70]	2019	single-omic: T	survival classification	pathways	MSigDB (Reactome)	ARCH	sparse DNN	weights and nodes activation
[89]	2019	sc single-omic: T	biological functions determination	pathways	DMAP	POSTHOC	AE	saliency maps
[39]	2020	multi-omics: T, E, G	patient stratification	pathways	NCI: PID	PRE	sparse DAE	SHAP
[80]	2020	multi-omics: T, G	patient stratification	pathways	KEGG	POSTHOC	DAE	latent space exploration
[63]	2021	multi-omics: T, G	predict disease state	pathways	Reactome	ARCH	sparse DNN	DeepLIFT
[67]	2021	multi-omics: T, G + clinical data	survival prediction	pathways	KEGG	ARCH	sparse DNN + CNN	smoothgrad
[69]	2021	multi-omics: T, G	drug response prediction	pathways	KEGG	ARCH	sparse DNN	smoothgrad
[37]	2021	multi-omics: T, E, G + clinical data	survival classification	pathways	KEGG	PRE	CNN	Grad-CAM
[66]	2021	multi-omics: T, E, G	survival prediction	pathways (to define functional modules)	MSigDB (KEGG and Reactome)	ARCH	sparse DNN	functional module activity
[72]	2020	sc single-omic: T	molecular interpretation of single-cell RNA-seq data	pathways and gene regulatory networks	SIGNOR, Harmonizome, TTRUST	ARCH	sparse DNN	in silico perturbation
[87]	2021	single-omic: T	cancer type classification	pathways, Gene Ontology	Reactome, GO	POSTHOC	VAE	DeepSHAP
[65]	2020	single-omic: T + drug targets + drug sensitivity	drug response prediction	pathways; drug sensitivity; drug-protein interactions	KEGG, GDSC, STITCH	ARCH	sparse DNN	pathway node activity
[71]	2021	sc single-omic: T	inferring gene module activities	pathways; gene regulatory networks; cell type identities (to define gene modules)	MSigDB (mainly Reactome and Hallmark)	ARCH	sparse VAE	latent space exploration
[40]	2020	single-omic: T	cancer type classification	pathways; PPI network	KEGG, BioGRID	PRE+ARCH+POSTHOC	GCN-MLP	attention mechanisms
[44]	2021	single-omic: T	cancer type classification	PPI network	BioGRID, DIP, InAct, MINT, MIPs	PRE	CNN
[45]	2021	single-omic: T	metastatic or non-metastatic classification	PPI network	HPRD	PRE	GCN	GLRP
[52]	2021	single-omic: G + clinical data	patient stratification	PPI network	> 10 PPI databases	PRE	struc2vec	latent space exploration
[41]	2021	multi-omics: T, E, G + clinical data	survival prediction	PPI network; driver genes	STRING, COSMIC	PRE	GCN	attention mechanisms; latent space exploration
[48]	2021	single-omic: T	cancer type classification	PPI network; other (co-expression graph)	STRING	PRE	GCN	in silico perturbation
[50]	2021	multi-omics: T, E, G	cancer gene prediction	PPI network; other (Gene-Gene interaction network, network of cancer genes NCG)	CPDB; collecion of labels from NCG, COSMIC, OMIM, KEGG	PRE+POSTHOC	GCN	LRP
[54]	2021	single-omic: T	drug response prediction	drug-target interaction, PPI network	DrugBank, ChEMBL, STRING	PRE	transformer + GCN	Shapley Additive Gene Set Enrichment Analysis (SAGSEA)
[62]	2021	multi-omics: T, E, G	gene dependency / cancer dependencies	fingerprint vector	MSigDB	PRE	AE+DNN	in silico perturbation
[75]	2019	single-omic: T	patient stratification	Gene Ontology	GO	ARCH	factor GNN	attention mechanisms; RLIPP
[74]	2020	single-omic: T + chemical structure network	drug response prediction	Gene Ontology	GO	ARCH	DNN + sparse DNN	RLIPP
[55]	2019	multi-omics: T+T + clinical data (not mandatory)	survival prediction	other (co-expression modules from lmQCM algorithm)		PRE+POSTHOC	DNN	in silico perturbation
[59]	2020	single-omic: T	survival outcome, histological grading	other (format the omic data into WGCNA graphs)		PRE	GNN	full-gradient graph saliency (FGS)
[58]	2021	sc multi-omics: T, E, G	regulatory process	other (knowledge-based graph “guidance graph”)		PRE	VAE	latent space exploration
[96]	2020	multi-omics: T, G + clinical data	survival classification	other (learnt bipartite graphs)		PRE	GNN
[77]	2021	sc single-omic: T	single-cell computational tasks	other (learnt gene regulatory network)		ARCH	VAE	latent space exploration
[57]	2021	multi-omics: T, E	cancer type classification	other (sample similarity networks)		PRE	GCN + VCDN	in silico perturbation
[91]	2018	single-omic: T	cancer type classification				VAE	latent space exploration
[92]	2018	single-omic: E	cancer type classification				VAE	latent space exploration
[2]	2019	multi-omics: T, G	drug response prediction				DNN
[82]	2019	multi-omics: T, G	patient stratification				VAE	latent space exploration
[81]	2019	single-omic: T	drug response prediction				VAE	latent space exploration
[93]	2019	single-omic: E	cancer type classification				VAE	latent space exploration
[94]	2019	single-omic: G	cancer type classification				AE	latent space exploration
[7]	2020	single-omic: G	cancer type classification				DNN
[83]	2021	multi-omics: T, E, G	survival classification				VAE	latent space exploration
[8]	2021	multi-omics: T, E for KIRC or multi-omics: T+T for HNSC	survival prediction				DBN
[9]	2021	multi-omics	survival classification				transformer	attention weights
